# Supplementary figures and images for: Template synthesis of functionalized polystyrene in ordered silicate channelsElectronic supplementary information (ESI) available: TEM image of sample 3b. See http://www.rsc.org/suppdata/cc/b4/b402794a/
Source: Royal Society of Chemistry journal article supplement (doi:10.1039/b402794a), 2004-01-01

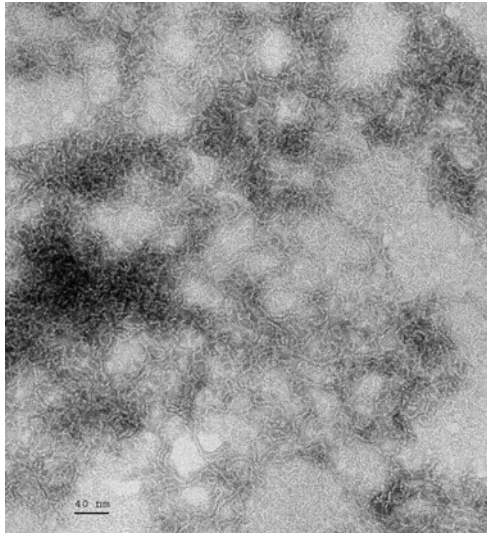

Supplement: b402794a.pdf [file b402794a.pdf]
